# Supplementary material for: Prion infection, transmission, and cytopathology modeled in a low-biohazard human cell line
Source: PubMed Central journal article supplement (PMC7335386; doi:10.26508/lsa.202000814), 2020-06-30
Supplement: LSA-2020-00814_review_history.pdf [file LSA-2020-00814_review_history.pdf]

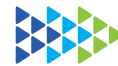

## Prion infection, transmission and cytopathology modelled in a low-biohazard human cell line

Merve Avar, Daniel Heinzer, Nicolas Steinke, Berre Doğançay, Rita Moos, Severine Lugan, Claudia Cosenza, Simone Hornemann, Olivier Andréoletti and Adriano Aguzzi

**DOI: 10.26508/lsa/202000814**

*Corresponding author(s): Prof. Adriano Aguzzi (University Hospital Zurich)*

---

### Review timeline:

---

|                     |            |
|---------------------|------------|
| Submission Date:    | 2020-06-16 |
| Editorial Decision: | 2020-06-18 |
| Revision Received:  | 2020-06-19 |
| Accepted:           | 2020-06-19 |

---

### Transaction Report:

(Note: With the exception of the correction of typographical or spelling errors that could be a source of ambiguity, letters and reports are not edited. The original formatting of letters and referee reports may not be reflected in this compilation.)

Please note that the manuscript was reviewed at *Review Commons* and these reports were taken into account in the decision-making process at Life Science alliance.

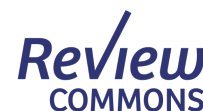

No Peer Review Process File is available with this article, as the authors have chosen not to make the review process public in this case.

1st Editorial Decision18 June 2020

June 18, 2020

RE: Life Science Alliance Manuscript #LSA-2020-00814-T

Prof. Adriano Aguzzi  
University Hospital Zurich  
Dept. of Pathology  
Institute of Neuropathology  
Zurich, ZH 8091  
Switzerland

Dear Dr. Aguzzi,

Thank you for submitting your revised manuscript entitled "Prion infection, transmission and cytopathology modelled in a low-biohazard human cell line". This manuscript was transferred from another journal, and the review process was carried out at Review Commons.

The reviewers who evaluated your study appreciated your findings, and we would therefore like to publish your work here. You already provided a point-by-point response to the concerns raised by the reviewers, and we have carefully evaluated your response. I think your response addresses the concerns in a good way, and I would thus like to ask you to upload a revised version of your manuscript, including the following changes:

- please fill in all mandatory information in the submission system (i.e. Category, Alternate Abstract, etc.)
- please add a conflict of interest statement to the main manuscript text
- please upload your figure files as separate files while leaving the figure legends in the main manuscript text
- please add a callout for Fig. 3D
- please upload your manuscript in the doc or docx format
- We noticed that your supplementary figures are source data. Thank you for sharing your source data, and we will publish this alongside your paper. However, these should not be part of the main manuscript, so please upload the source data as 'source data files' rather than supplementary figures.

If you are planning a press release on your work, please inform us immediately to allow informing our production team and scheduling a release date.

To upload the final version of your manuscript, please log in to your account:

<https://lsa.msubmit.net/cgi-bin/main.plex>

You will be guided to complete the submission of your revised manuscript and to fill in all necessary information. Please get in touch in case you do not know or remember your login name.

To avoid unnecessary delays in the acceptance and publication of your paper, please read the following information carefully.

A. FINAL FILES:

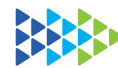

These items are required for acceptance.

-- An editable version of the final text (.DOC or .DOCX) is needed for copyediting (no PDFs).

-- High-resolution figure, supplementary figure and video files uploaded as individual files: See our detailed guidelines for preparing your production-ready images, <http://www.life-science-alliance.org/authors>

-- Summary blurb (enter in submission system): A short text summarizing in a single sentence the study (max. 200 characters including spaces). This text is used in conjunction with the titles of papers, hence should be informative and complementary to the title. It should describe the context and significance of the findings for a general readership; it should be written in the present tense and refer to the work in the third person. Author names should not be mentioned.

## B. MANUSCRIPT ORGANIZATION AND FORMATTING:

Full guidelines are available on our Instructions for Authors page, <http://www.life-science-alliance.org/authors>

We encourage our authors to provide original source data, particularly uncropped/-processed electrophoretic blots and spreadsheets for the main figures of the manuscript. If you would like to add source data, we would welcome one PDF/Excel-file per figure for this information. These files will be linked online as supplementary "Source Data" files.

**\*\*Submission of a paper that does not conform to Life Science Alliance guidelines will delay the acceptance of your manuscript.\*\***

**\*\*It is Life Science Alliance policy that if requested, original data images must be made available to the editors. Failure to provide original images upon request will result in unavoidable delays in publication. Please ensure that you have access to all original data images prior to final submission.\*\***

**\*\*The license to publish form must be signed before your manuscript can be sent to production. A link to the electronic license to publish form will be sent to the corresponding author only. Please take a moment to check your funder requirements.\*\***

**\*\*Reviews, decision letters, and point-by-point responses associated with peer-review at Life Science Alliance will be published online, alongside the manuscript. If you do want to opt out of having the reviewer reports and your point-by-point responses displayed, please let us know immediately.\*\***

Thank you for your attention to these final processing requirements. Please revise and format the manuscript and upload materials within 7 days.

Thank you for this interesting contribution, we look forward to publishing your paper in Life Science Alliance.

Sincerely,

Reilly Lorenz  
Editorial Office Life Science Alliance



Meyerhofstr. 1  
69117 Heidelberg, Germany  
t +49 6221 8891 414  
e [contact@life-science-alliance.org](mailto:contact@life-science-alliance.org)  
[www.life-science-alliance.org](http://www.life-science-alliance.org)

---

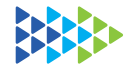

RE: Life Science Alliance Manuscript #LSA-2020-00814-TR

Prof. Adriano Aguzzi  
University Hospital Zurich  
Dept. of Pathology  
Institute of Neuropathology  
Zurich, ZH 8091  
Switzerland

Dear Dr. Aguzzi,

Thank you for submitting your Research Article entitled "Prion infection, transmission and cytopathology modelled in a low-biohazard human cell line". It is a pleasure to let you know that your manuscript is now accepted for publication in Life Science Alliance. Congratulations on this interesting work.

The final published version of your manuscript will be deposited by us to PubMed Central upon online publication.

Your manuscript will now progress through copyediting and proofing. It is journal policy that authors provide original data upon request.

Reviews, decision letters, and point-by-point responses associated with peer-review at Life Science Alliance will be published online, alongside the manuscript. If you do want to opt out of having the reviewer reports and your point-by-point responses displayed, please let us know immediately.

**\*\*\*IMPORTANT:** If you will be unreachable at any time, please provide us with the email address of an alternate author. Failure to respond to routine queries may lead to unavoidable delays in publication.\*\*\*

Scheduling details will be available from our production department. You will receive proofs shortly before the publication date. Only essential corrections can be made at the proof stage so if there are any minor final changes you wish to make to the manuscript, please let the journal office know now.

#### DISTRIBUTION OF MATERIALS:

Authors are required to distribute freely any materials used in experiments published in Life Science Alliance. Authors are encouraged to deposit materials used in their studies to the appropriate repositories for distribution to researchers.

You can contact the journal office with any questions, [contact@life-science-alliance.org](mailto:contact@life-science-alliance.org)

Again, congratulations on a very nice paper. I hope you found the review process to be constructive and are pleased with how the manuscript was handled editorially. We look forward to future exciting submissions from your lab.

Sincerely,

Reilly Lorenz  
Editorial Office Life Science Alliance



Meyerhofstr. 1  
69117 Heidelberg, Germany  
t +49 6221 8891 414  
e [contact@life-science-alliance.org](mailto:contact@life-science-alliance.org)  
[www.life-science-alliance.org](http://www.life-science-alliance.org)
